# Supplementary material for: An Algorithm to Detect Endangered Cultural Heritage by Agricultural Expansion in Drylands at a Global Scale
Source: MDPI journal article supplement (doi:10.3390/rs15010053), 2022-12-22
Supplement: s1 [file s1]

# An algorithm to detect endangered Cultural Heritage by agricultural expansion in drylands at a global scale

Francesc C. Conesa<sup>1\*</sup>, Hector A. Orengo<sup>1,2\*</sup>, Agustín Lobo<sup>3</sup>, Cameron A. Petrie<sup>4</sup>

<sup>1</sup> Landscape Archaeology Research Group (GIAP), Catalan Institute of Classical Archaeology (ICAC);

<sup>2</sup> Catalan Institution for Research and Advanced Studies (ICREA)

<sup>3</sup> GEO3BCN, Spanish National Research Council; Agustin.Lobo@geo3bcn.csic.es

<sup>4</sup> Department of Archaeology, University of Cambridge; cap59@cam.ac.uk

\* Correspondence: fconesa@icac.cat, horengo@icac.cat

---

**Table SM1.** Spatial counts for endangered site buffers in the Cholistan Desert (algorithm last date set to 04/11/2022).

| Endangered area |     | Endangered levels |    |
|-----------------|-----|-------------------|----|
| Yes             | 158 | Extreme           | 20 |
| No              | 179 | High              | 29 |
| Total           | 337 | Moderate          | 36 |
|                 |     | Low               | 73 |

  

| Year | First impact | Last impact | Most occurrence |
|------|--------------|-------------|-----------------|
| 2017 | 56           | 1           | 37              |
| 2018 | 13           | 6           | 14              |
| 2019 | 19           | 2           | 11              |
| 2020 | 22           | 3           | 20              |
| 2021 | 17           | 5           | 22              |
| 2022 | 31           | 141         | 54              |

---
